# Supplementary material for: Tracking the dynamics of individual gut microbiome of sea cucumber Apostichopus japonicus during gut regeneration
Source: PubMed Central journal article supplement (PMC7718794; doi:10.7717/peerj.10260), 2020-12-01
Supplement: peerj-08-10260-s001.pdf [file peerj-08-10260-s001.pdf]

**Table S1. Sample information in caged mariculture experiment**

| sample-id   | specimen-id | Month | Regeneration | No. of raw reads | No. of qualified bacterial reads | No. of qualified chloroplast reads | No. of qualified mitochondria reads |
|-------------|-------------|-------|--------------|------------------|----------------------------------|------------------------------------|-------------------------------------|
| ApF17       | Cont-B      | Apr   | Control      | 23,501           | 5,859                            | 9,461                              | 0                                   |
| ApF41       | Cont-C      | Apr   | Control      | 26,915           | 6,463                            | 11,577                             | 0                                   |
| ApF42       | Regen-C     | Apr   | Regeneration | 28,094           | 10,621                           | 8,369                              | 0                                   |
| ApF51       | Cont-C      | Apr   | Control      | 28,261           | 9,178                            | 9,532                              | 0                                   |
| DF101       | Cont-A      | Dec   | Control      | 30,207           | 16,717                           | 1,847                              | 0                                   |
| DF102       | Cont-C      | Dec   | Control      | 46,624           | 25,886                           | 2,334                              | 0                                   |
| DF103       | Cont-D      | Dec   | Control      | 36,146           | 20,189                           | 2,184                              | 0                                   |
| DF16        | Regen-A     | Dec   | Regeneration | 25,152           | 15,012                           | 499                                | 0                                   |
| DF17-170126 | Cont-B      | Dec   | Control      | 33,116           | 16,720                           | 1,117                              | 0                                   |
| DF18        | Regen-B     | Dec   | Regeneration | 24,115           | 14,450                           | 819                                | 0                                   |
| DF42        | Regen-C     | Dec   | Regeneration | 26,471           | 15,628                           | 342                                | 0                                   |
| JulyF15     | Cont-A      | July  | Control      | 47,288           | 24,818                           | 1,591                              | 0                                   |
| JulyF16     | Regen-A     | July  | Regeneration | 44,579           | 23,472                           | 1,722                              | 0                                   |
| JulyF17     | Cont-B      | July  | Control      | 41,111           | 21,876                           | 723                                | 0                                   |
| JulyF18     | Regen-B     | July  | Regeneration | 41,880           | 21,375                           | 1,369                              | 0                                   |
| JulyF41     | Cont-C      | July  | Control      | 50,814           | 24,298                           | 1,550                              | 0                                   |
| JulyF42     | Regen-C     | July  | Regeneration | 46,035           | 22,834                           | 1,971                              | 0                                   |
| JulyF51     | Cont-D      | July  | Control      | 40,304           | 21,342                           | 1,816                              | 0                                   |
| JunF15      | Cont-A      | Jun   | Control      | 35,627           | 19,486                           | 2,311                              | 0                                   |
| JunF17      | Cont-B      | Jun   | Control      | 30,872           | 16,565                           | 1,301                              | 0                                   |
| JunF18      | Regen-B     | Jun   | Regeneration | 56,386           | 27,927                           | 5,483                              | 0                                   |
| JunF42      | Regen-C     | Jun   | Regeneration | 60,535           | 33,770                           | 2,534                              | 0                                   |
| JunF51      | Cont-D      | Jun   | Control      | 29,306           | 16,520                           | 1,817                              | 0                                   |
| MaF15       | Cont-A      | May   | Control      | 48,389           | 17,776                           | 9,745                              | 0                                   |
| MaF16       | Regen-A     | May   | Regeneration | 32,013           | 16,264                           | 4,837                              | 0                                   |
| MaF18       | Regen-B     | May   | Regeneration | 27,195           | 13,164                           | 3,604                              | 0                                   |
| MaF41       | Cont-C      | May   | Control      | 32,090           | 15,751                           | 5,413                              | 0                                   |
| MaF42       | Regen-C     | May   | Regeneration | 32,194           | 16,667                           | 3,582                              | 0                                   |
| MaF51       | Cont-D      | May   | Control      | 24,671           | 9,187                            | 6,857                              | 5                                   |

**Table S2. Sample information in the laboratory feeding experiment**

| sample-id | Specimen-id | Group       | Time-points | No. of raw reads | No. of qualified bacterial reads | No. of qualified eukaryotic reads |
|-----------|-------------|-------------|-------------|------------------|----------------------------------|-----------------------------------|
| A10May19  | Regen-1     | Regeneraion | 18          | 29,501           | 21,959                           | 89                                |
| A16May19  | Regen-1     | Regeneraion | 24          | 49,278           | 37,805                           | 51                                |
| A20May19  | Regen-1     | Regeneraion | 28          | 70,620           | 52,970                           | 28                                |
| A22Apr19  | Regen-1     | Regeneraion | 0           | 32,553           | 24,433                           | 113                               |
| A8May19   | Regen-1     | Regeneraion | 16          | 46,632           | 35,733                           | 22                                |
| A9May19   | Regen-1     | Regeneraion | 17          | 32,531           | 24,962                           | 51                                |
| B16May19  | Regen-2     | Regeneraion | 24          | 121,076          | 81,388                           | 0                                 |
| B17May19  | Regen-2     | Regeneraion | 25          | 53,693           | 36,288                           | 35                                |
| B18May19  | Regen-2     | Regeneraion | 26          | 54,440           | 43,282                           | 16                                |
| B22Apr19  | Regen-2     | Regeneraion | 0           | 34,556           | 27,402                           | 0                                 |
| C16May19  | Regen-3     | Regeneraion | 24          | 58,718           | 42,642                           | 237                               |
| C20May19  | Regen-3     | Regeneraion | 28          | 52,457           | 41,050                           | 25                                |
| C22Apr19  | Regen-3     | Regeneraion | 0           | 33,162           | 25,337                           | 15                                |
| C7May19   | Regen-3     | Regeneraion | 15          | 34,141           | 25,887                           | 56                                |
| C8May19   | Regen-3     | Regeneraion | 16          | 36,794           | 27,751                           | 27                                |
| C9May19   | Regen-3     | Regeneraion | 17          | 39,881           | 29,382                           | 20                                |
| D12May19  | Cont-1      | Control     | 20          | 50,097           | 35,312                           | 0                                 |
| D16May19  | Cont-1      | Control     | 24          | 54,991           | 40,947                           | 3                                 |
| D20May19  | Cont-1      | Control     | 28          | 62,294           | 46,189                           | 0                                 |
| D22Apr19  | Cont-1      | Control     | 0           | 30,327           | 23,749                           | 44                                |
| D7May19   | Cont-1      | Control     | 15          | 39,352           | 28,417                           | 0                                 |
| D8May19   | Cont-1      | Control     | 16          | 36,690           | 24,377                           | 0                                 |
| D9May19   | Cont-1      | Control     | 17          | 41,361           | 26,517                           | 0                                 |
| E12May19  | Regen-4     | Regeneraion | 20          | 63,538           | 43,934                           | 8                                 |
| E16May19  | Regen-4     | Regeneraion | 24          | 66,153           | 45,770                           | 17                                |
| E20May19  | Regen-4     | Regeneraion | 28          | 60,521           | 44,656                           | 74                                |
| E22Apr19  | Regen-4     | Regeneraion | 0           | 39,301           | 28,965                           | 0                                 |
| E7May19   | Regen-4     | Regeneraion | 15          | 31,806           | 23,629                           | 173                               |
| E8May19   | Regen-4     | Regeneraion | 16          | 42,856           | 28,268                           | 50                                |
| E9May19   | Regen-4     | Regeneraion | 17          | 66,034           | 42,544                           | 355                               |
| F12May19  | Regen-5     | Regeneraion | 20          | 60,851           | 43,100                           | 10                                |
| F16May19  | Regen-5     | Regeneraion | 24          | 60,068           | 42,283                           | 9                                 |
| F20May19  | Regen-5     | Regeneraion | 28          | 61,939           | 45,378                           | 13                                |
| F22Apr19  | Regen-5     | Regeneraion | 0           | 44,891           | 34,352                           | 3                                 |
| F7May19   | Regen-5     | Regeneraion | 15          | 40,297           | 28,828                           | 277                               |
| F8May19   | Regen-5     | Regeneraion | 16          | 58,208           | 40,157                           | 44                                |
| F9May19   | Regen-5     | Regeneraion | 17          | 38,815           | 25,338                           | 39                                |
| G12May19  | Cont-2      | Control     | 20          | 76,418           | 45,891                           | 6                                 |
| G16May19  | Cont-2      | Control     | 24          | 92,206           | 61,219                           | 2                                 |
| G20May19  | Cont-2      | Control     | 28          | 58,701           | 42,755                           | 0                                 |
| G22Apr19  | Cont-2      | Control     | 0           | 35,838           | 25,284                           | 17                                |
| G9May19   | Cont-2      | Control     | 17          | 64,161           | 41,145                           | 48                                |
| H12May19  | Cont-3      | Control     | 20          | 52,204           | 39,918                           | 0                                 |
| H16May19  | Cont-3      | Control     | 24          | 59,479           | 45,594                           | 0                                 |
| H20May19  | Cont-3      | Control     | 28          | 58,916           | 44,376                           | 0                                 |
| H22Apr19  | Cont-3      | Control     | 0           | 31,463           | 22,828                           | 0                                 |
| H7May19   | Cont-3      | Control     | 15          | 35,452           | 26,964                           | 0                                 |
| H8May19   | Cont-3      | Control     | 16          | 37,861           | 26,525                           | 0                                 |
| H9May19   | Cont-3      | Control     | 17          | 37,474           | 24,420                           | 0                                 |

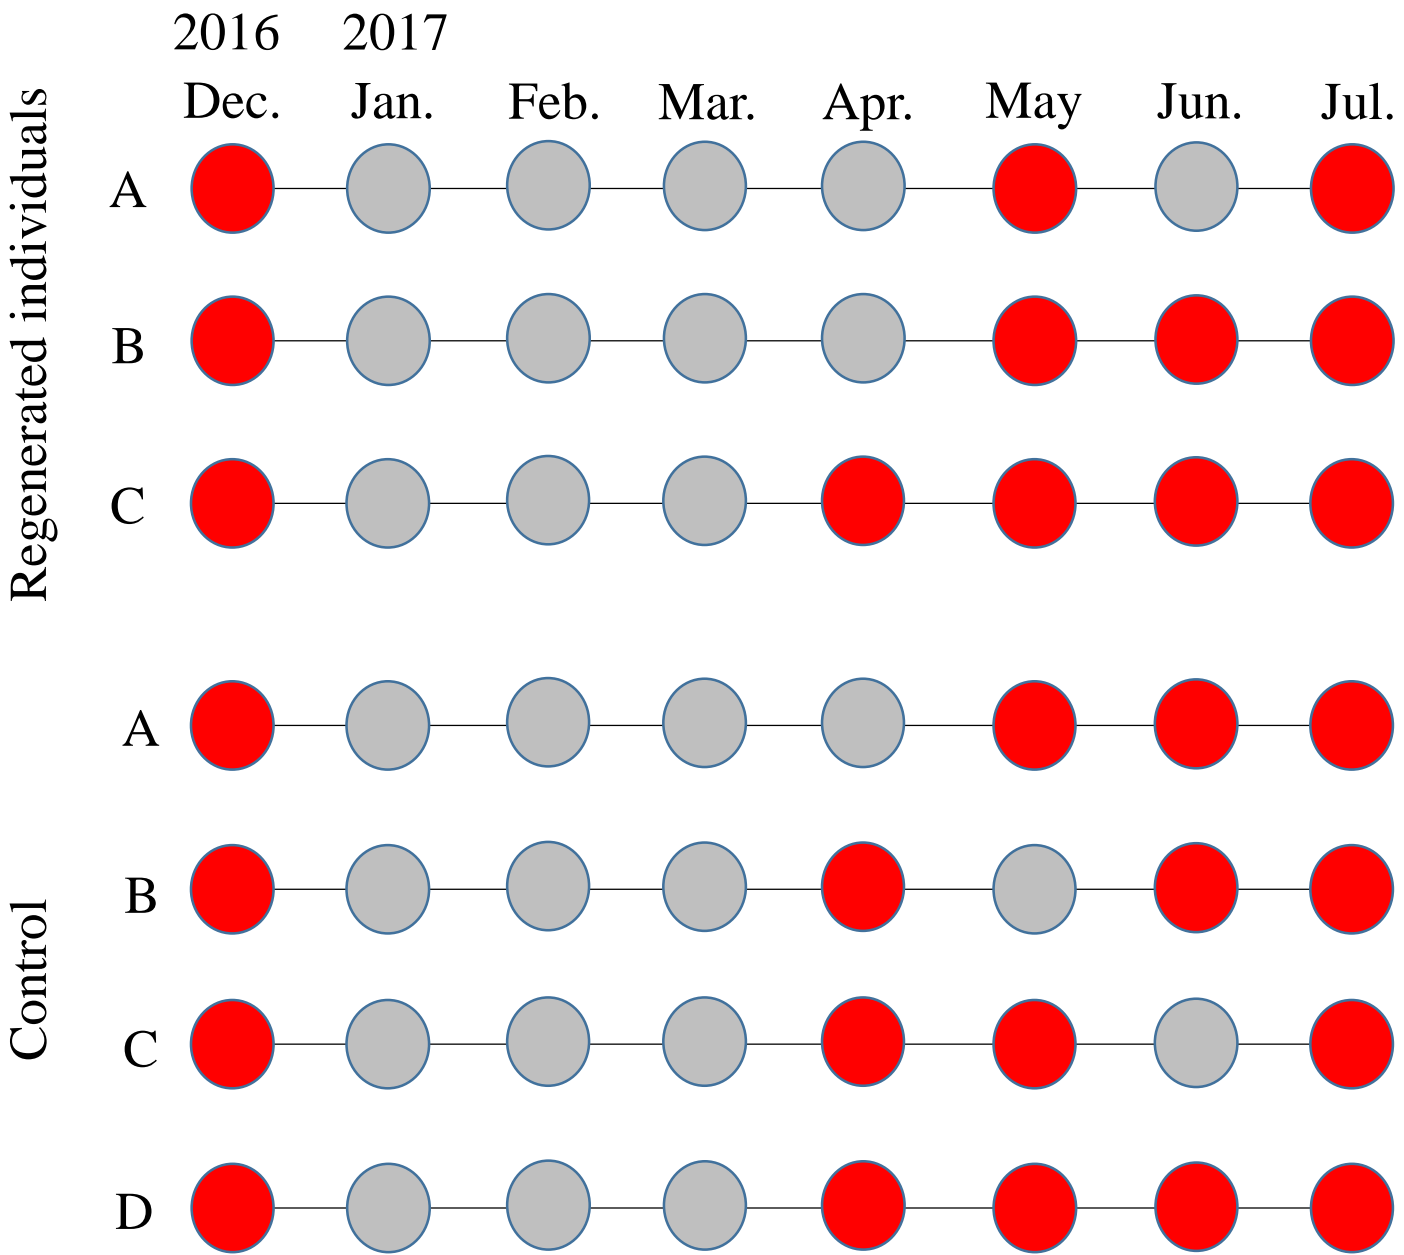

**Fig. S1. Experimental design of the caged mariculture experiment.** Fecal samples were collected in time points with marked red circles. I removed sea cucumbers' guts on December 2016. Their guts were already regenerated in April 2017.



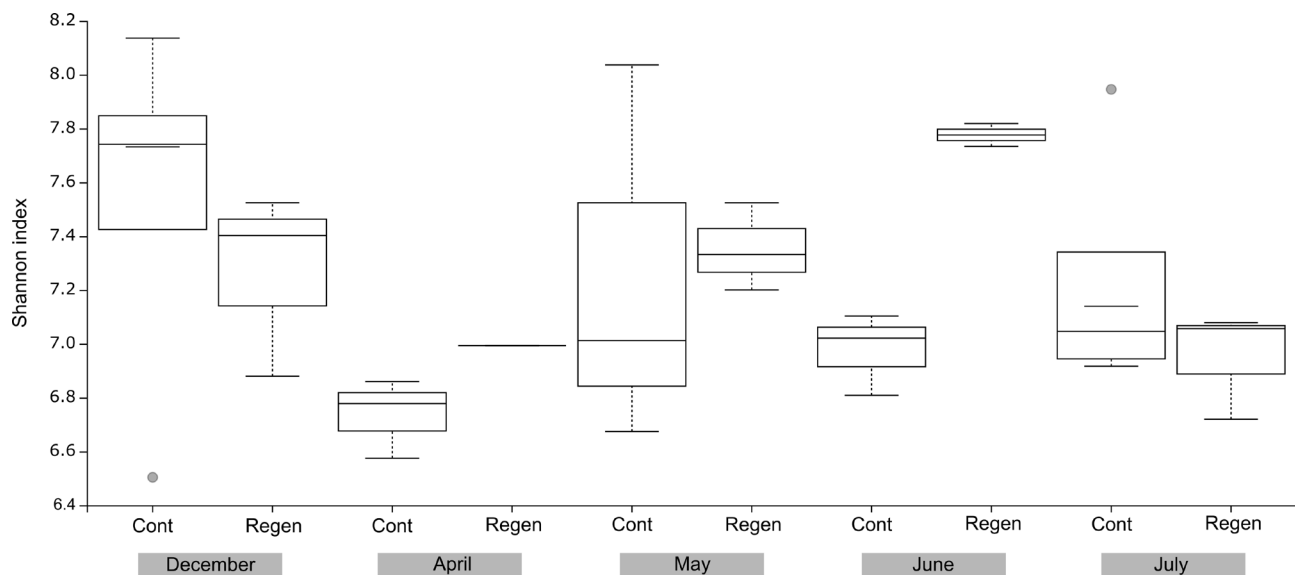

**Fig. S3. Shannon index comparisons between the regeneration group and controls in the mariculture experiment.** The regeneration group is indicated by “Regen.”, and the control group is indicated by “Cont.”. (A) Samples collected in December 2016 (i.e. pre- evisceration) were analyzed. (B) Samples collected in April, May June and July 2017 (post- evisceration) were analyzed. N.S. stands for not significant ( $p \geq 0.05$ ).

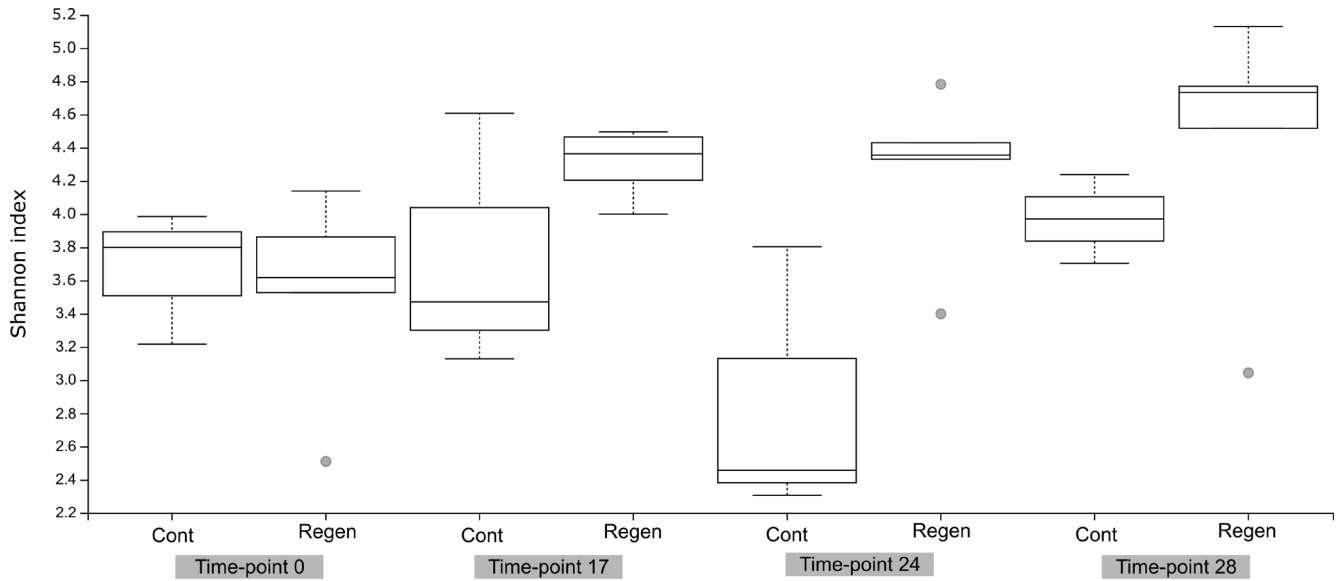

**Fig. S4. The Shannon index comparisons between the regeneration group and controls in the laboratory isolator.** The regeneration group is indicated by “Regen.”, and the control group is indicated by “Cont.”. (A) Samples collected at time-point 0 were analyzed. N.S. stands for not significant ( $p \geq 0.05$ ). (B) Samples collected at all time-points of post-evisceration were analyzed. N.S. stands for not significant ( $p \geq 0.05$ ).
